# Supplementary material for: Probiotics for respiratory tract infections in children attending day care centers—a systematic review
Source: Springer Nature journal article supplement (doi:10.1007/s00431-018-3167-1), 2018-05-11
Supplement: MOESM4 [file 15758812]

**Supplement Table 3.** GRADE evidence profile summarizing the effects of probiotics vs. placebo on number of children with acute otitis media.

**Setting**: Day care center

| **Certainty assessment** | | | | | | | **№ of patients** | | **Effect** | | **Certainty** | **Importance** |
| --- | --- | --- | --- | --- | --- | --- | --- | --- | --- | --- | --- | --- |
| **№ of studies** | **Study design** | **Risk of bias** | **Inconsistency** | **Indirectness** | **Imprecision** | **Other considerations** | **probiotics** | **placebo** | **Relative (95% CI)** | **Absolute (95% CI)** |
| children with otitis | | | | | | | | | | | | |
| 4 | randomised trials | not serious | not serious | not serious | serious a | none | 146/638 (22.9%) | 178/651 (27.3%) | **RR 0.85** (0.67 to 1.06) | **41 fewer per 1,000** (from 16 more to 90 fewer) | ⨁⨁⨁◯ MODERATE | IMPORTANT |
| children with otitis - LGG | | | | | | | | | | | | |
| 2 | randomised trials | not serious | not serious | not serious | serious a | none | 88/391 (22.5%) | 120/403 (29.8%) | **RR 0.71** (0.46 to 1.11) | **86 fewer per 1,000** (from 33 more to 161 fewer) | ⨁⨁⨁◯ MODERATE | IMPORTANT |
| children with otitis - BB12 | | | | | | | | | | | | |
| 1 | randomised trials | not serious | not serious | not serious | serious a | none | 15/104 (14.4%) | 18/106 (17.0%) | **RR 0.85** (0.45 to 1.59) | **25 fewer per 1,000** (from 93 fewer to 100 more) | ⨁⨁⨁◯ MODERATE | IMPORTANT |
| children with otitis - BB12+LGG | | | | | | | | | | | | |
| 1 | randomised trials | not serious | not serious | not serious | serious b | none | 43/143 (30.1%) | 40/142 (28.2%) | **RR 1.07** (0.74 to 1.53) | **20 more per 1,000** (from 73 fewer to 149 more) | ⨁⨁⨁◯ MODERATE | IMPORTANT |

**CI:** Confidence interval; **RR:** Risk ratio; **MD:** Mean difference

#### Explanations

a. Due to difference in reporting outcome other study/studies could not be analyzed

b. Only one RCT
