# Supplementary material for: Probiotics for respiratory tract infections in children attending day care centers—a systematic review
Source: Springer Nature journal article supplement (doi:10.1007/s00431-018-3167-1), 2018-05-11
Supplement: MOESM6 [file 15758812]

**Supplement Table 5**. GRADE evidence profile summarizing the effects of probiotics vs. placebo on duration of respiratory tract infection.

**Setting**: Day care center.

| **Certainty assessment** | | | | | | | **№ of patients** | | **Effect** | | **Certainty** | **Importance** |
| --- | --- | --- | --- | --- | --- | --- | --- | --- | --- | --- | --- | --- |
| **№ of studies** | **Study design** | **Risk of bias** | **Inconsistency** | **Indirectness** | **Imprecision** | **Other considerations** | **probiotics** | **placebo** | **Relative (95% CI)** | **Absolute (95% CI)** |
| duration of respiratory tract infection | | | | | | | | | | | | |
| 9 | randomised trials | serious a | not serious | not serious | serious b | none | 1780 | 1749 | - | MD **0.81 lower** (1.88 lower to 0.25 higher) | ⨁⨁◯◯ LOW | IMPORTANT |
| duration of respiratory tract infection - LGG | | | | | | | | | | | | |
| 3 | randomised trials | not serious | not serious | not serious | not serious | none | 642 | 653 | - | MD **0.78 lower** (1.46 lower to 0.09 lower) | ⨁⨁⨁⨁ HIGH | IMPORTANT |
| duration of respiratory tract infection - BB12 | | | | | | | | | | | | |
| 2 | randomised trials | not serious | not serious | not serious | not serious | none | 177 | 166 | - | MD **0.25 higher** (0.21 lower to 0.71 higher) | ⨁⨁⨁⨁ HIGH | IMPORTANT |
| duration of respiratory tract infection - L acidophilus NCFM | | | | | | | | | | | | |
| 1 | randomised trials | not serious | not serious | not serious | serious c | none | 110 | 104 | - | MD **2 lower** (3.66 lower to 0.34 lower) | ⨁⨁⨁◯ MODERATE | IMPORTANT |
| duration of respiratory tract infection - L rhamnosus HN001 | | | | | | | | | | | | |
| 1 | randomised trials | not serious | not serious | not serious | serious c | none | 203 | 195 | - | MD **1 higher** (1.87 lower to 3.87 higher) | ⨁⨁⨁◯ MODERATE | IMPORTANT |
| duration of respiratory tract infection - L reuteri DSM 17938 | | | | | | | | | | | | |
| 1 | randomised trials | not serious | not serious | not serious | serious c | none | 168 | 168 | - | MD **3.1 lower** (3.39 lower to 2.81 lower) | ⨁⨁⨁◯ MODERATE | IMPORTANT |
| duration of respiratory tract infection - L casei CNCM I-1518 | | | | | | | | | | | | |
| 1 | randomised trials | not serious | not serious | not serious | serious b | none | 300 | 299 | - | MD **0.17 higher** (0.66 lower to 1 higher) | ⨁⨁⨁◯ MODERATE | IMPORTANT |
| duration of respiratory tract infection - L reuteri ATCC 55730 | | | | | | | | | | | | |
| 1 | randomised trials | not serious | not serious | not serious | serious c | none | 68 | 60 | - | MD **0.22 lower** (0.62 lower to 0.18 higher) | ⨁⨁⨁◯ MODERATE | IMPORTANT |
| duration of respiratory tract infection - L acidophilus NCFM + B animalis subsp lactis Bi-07 | | | | | | | | | | | | |
| 1 | randomised trials | not serious | not serious | not serious | serious c | none | 112 | 104 | - | MD **3.1 lower** (4.66 lower to 1.54 lower) | ⨁⨁⨁◯ MODERATE | IMPORTANT |

**CI:** Confidence interval; **RR:** Risk ratio; **MD:** Mean difference

#### Explanations

a. High I2

b. Due to difference in reporting outcome other study/studies could not be analyzed

c. Only one RCT
